# Supplementary material for: Heparin-binding protein (HBP) improves prediction of sepsis-related acute kidney injury
Source: Springer Nature journal article supplement (doi:10.1186/s13613-017-0330-1), 2017-10-18

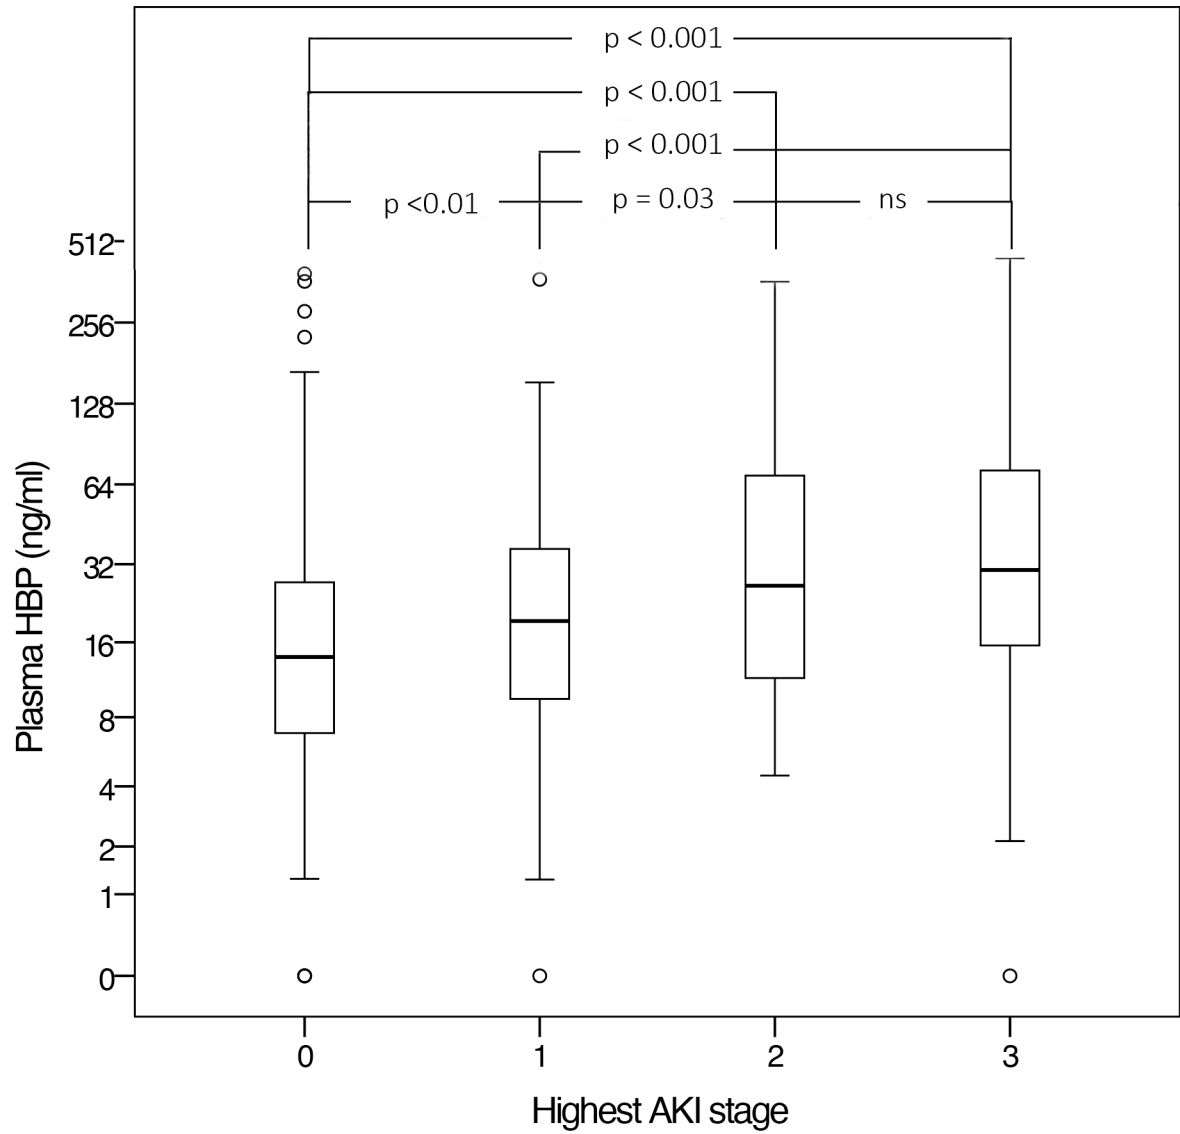

Supplement: MOESM2 [file 15145096]
