# Supplementary material for: Heparin-binding protein (HBP) improves prediction of sepsis-related acute kidney injury
Source: Springer Nature journal article supplement (doi:10.1186/s13613-017-0330-1), 2017-10-18

Fluid balance (ml)

20000  
15000  
10000  
5000  
0  
-5000

0 1 2 4 8 16 32 64 128 256 512

Plasma HBP (ng/ml)

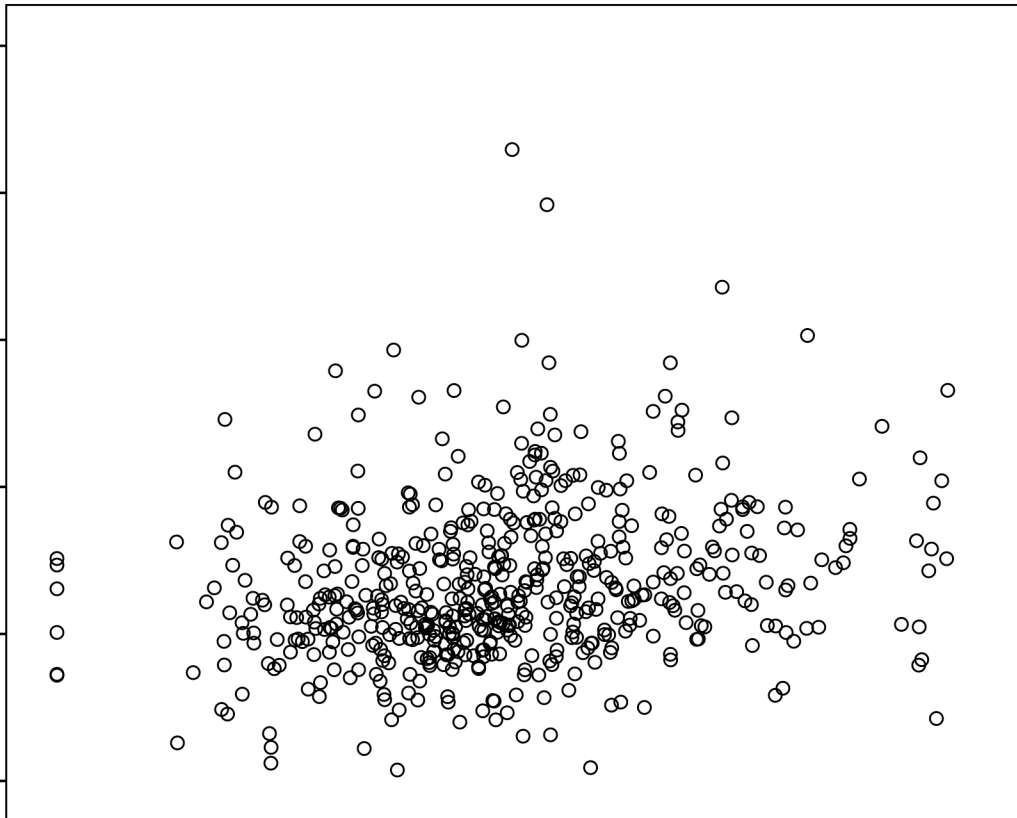

Supplement: MOESM3 [file 15145096]
